# Supplementary material for: Circadian regulation of human cortical excitability
Source: PubMed Central journal article supplement (PMC4931032; doi:10.1038/ncomms11828), 2016-06-24
Supplement: ncomms11828-s1.pdf [file ncomms11828-s1.pdf]

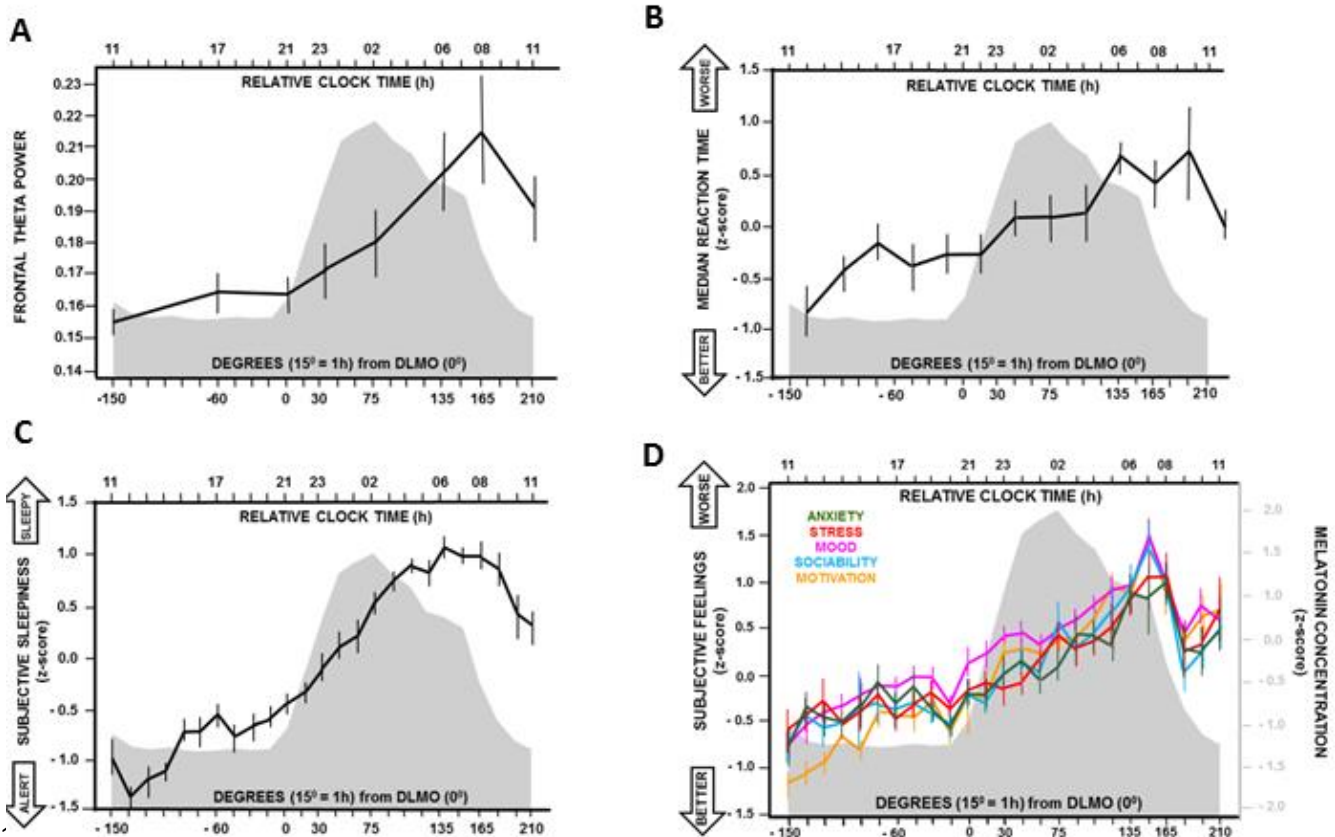

2 **Supplementary figure 1. Time course (mean  $\pm$  SD) of waking EEG frontal theta activity (A), median**  
 3 **reaction time to the psychomotor vigilance task (B), subjective sleepiness (C) and subjective affects (D)**  
 4 **across the protocol. Mean z-scored melatonin profile is displayed in background light grey. The top x axis**  
 5 **indicates the relative clock time for a participant with an 11 pm-7am sleep wake schedule. All variables**  
 6 **underwent typical significant variations during the protocol [PROC MIXED;  $n = 22$  ; Theta:  $F_{(7,103)} = 3.73$ ,  $p =$**   
 7 **.0012; PVT:  $F_{(11,209)} = 3.78$ ,  $p < .0001$ ; sleepiness :  $F_{(24,366)} = 17.72$ ,  $p < .0001$ ; subjective affects:  $F_{(24,368)} > 4$ ,  $p <$**   
 8 **.0001] with relatively stable values during the normal waking day period followed by a decrement during**  
 9 **the biological night and subsequent partial recuperation (verified through multiple post-hoc analyses –**  
 10 **not shown). All data are realigned to melatonin onset secretion. Due to slight delays in PVT sessions**  
 11 **between participants, PVT was performed, as represented here, at 13 different circadian phases**  
 12 **although there were only 12 PVT sessions per participant.**

13

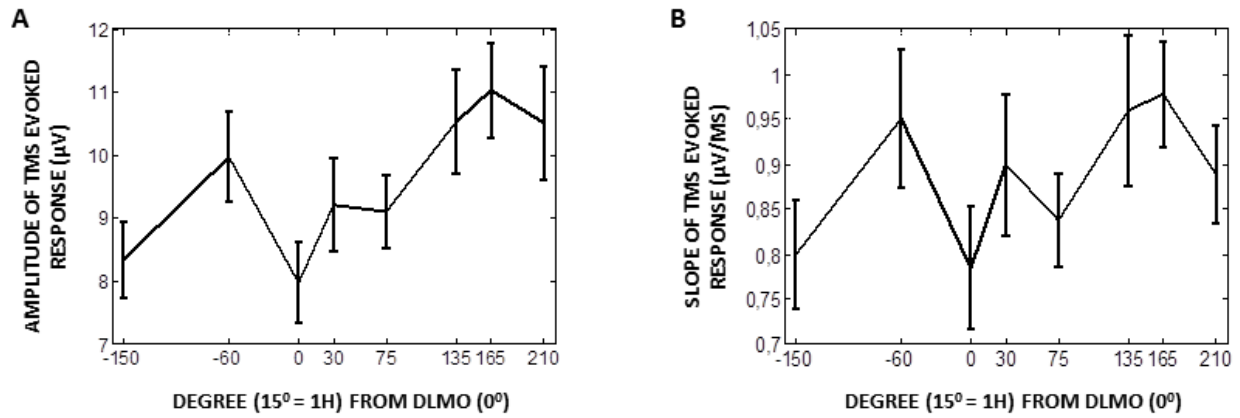

14

15 **Supplementary figure 2: Time course of raw (not z-scored) measures of cortical excitability across 29h**  
 16 **of sustained wakefulness (mean ± sem).**

17 **A.** Amplitude of the TMS evoked EEG responses

18 **B.** Slope of the TMS evoked EEG responses

19 Raw data are displayed for completeness. Given their high skewedness level, statistical analyses were  
 20 only performed on z-scored values (see main text and Figure 2).

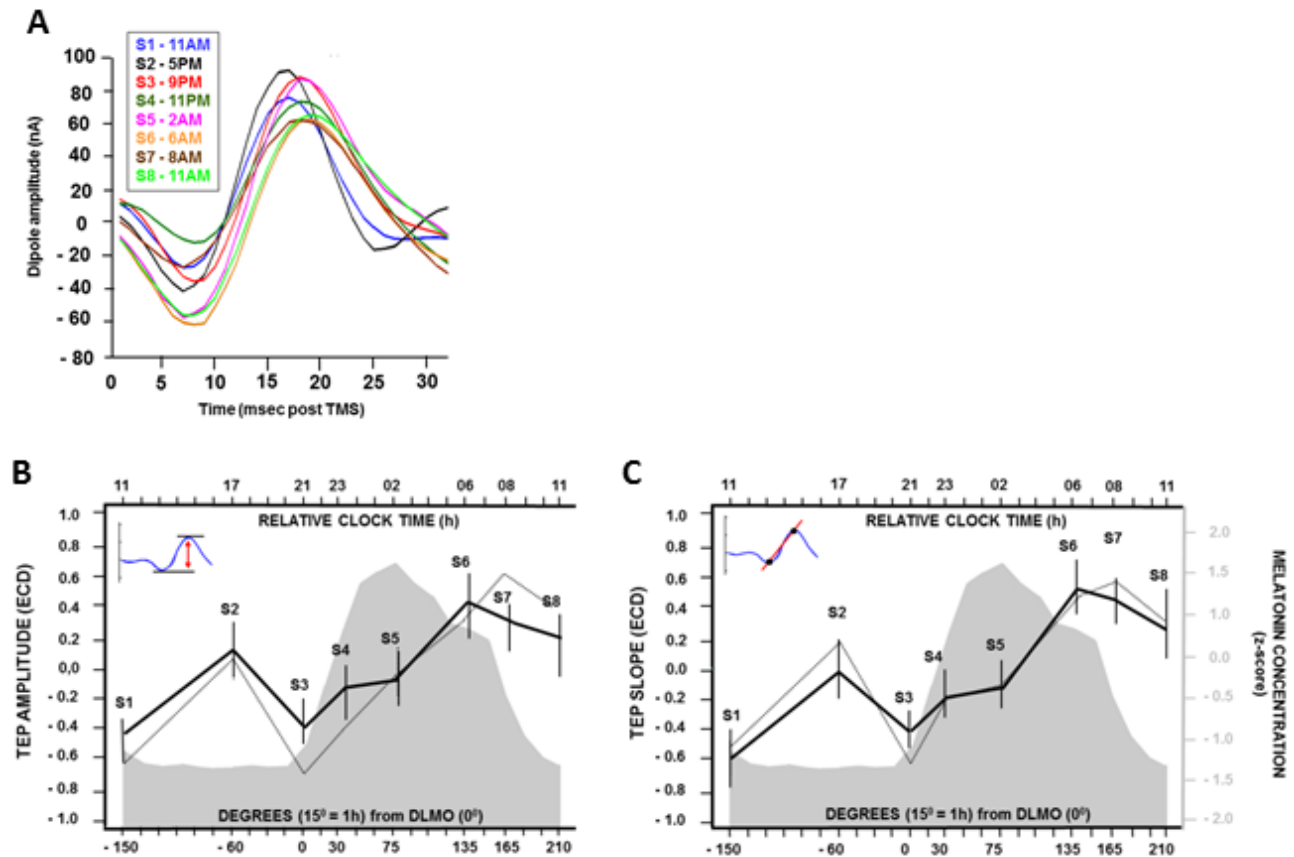

21

22

### 23 **Supplementary figure 3: Cortical excitability dynamics inferred following EEG source reconstruction.**

24 **A.** TMS-evoked potential (TEP) responses (0-30 ms post-TMS) computed at the hotspot after equivalent  
 25 current dipole (ECD) source reconstruction, i.e. based on information for all available EEG electrodes, in a  
 26 representative participant with habitual bed and wake-up times at 11 pm and 7 am, respectively.

27 **B-C.** Time course of TMS evoked response amplitude (B) and slope (C) at the hotspot based on dipole  
 28 amplitude and orientation. Mean z-scored melatonin profile is displayed background in light grey. The  
 29 top x axis indicates the relative clock time for a participant with an 11 pm-7am sleep wake schedule.  
 30 Both indices showed significant variation with time [PROC MIXED; n=23; time effect: amplitude  $F_{(7,137)} =$   
 31 2.96,  $p < .0001$ ; slope :  $F_{(7,137)} = 4.66$ ,  $p < .0001$ ]. Dashed line: TEP z-scored amplitude (cf. Fig. 2).

32

33

34

35

36

37

38

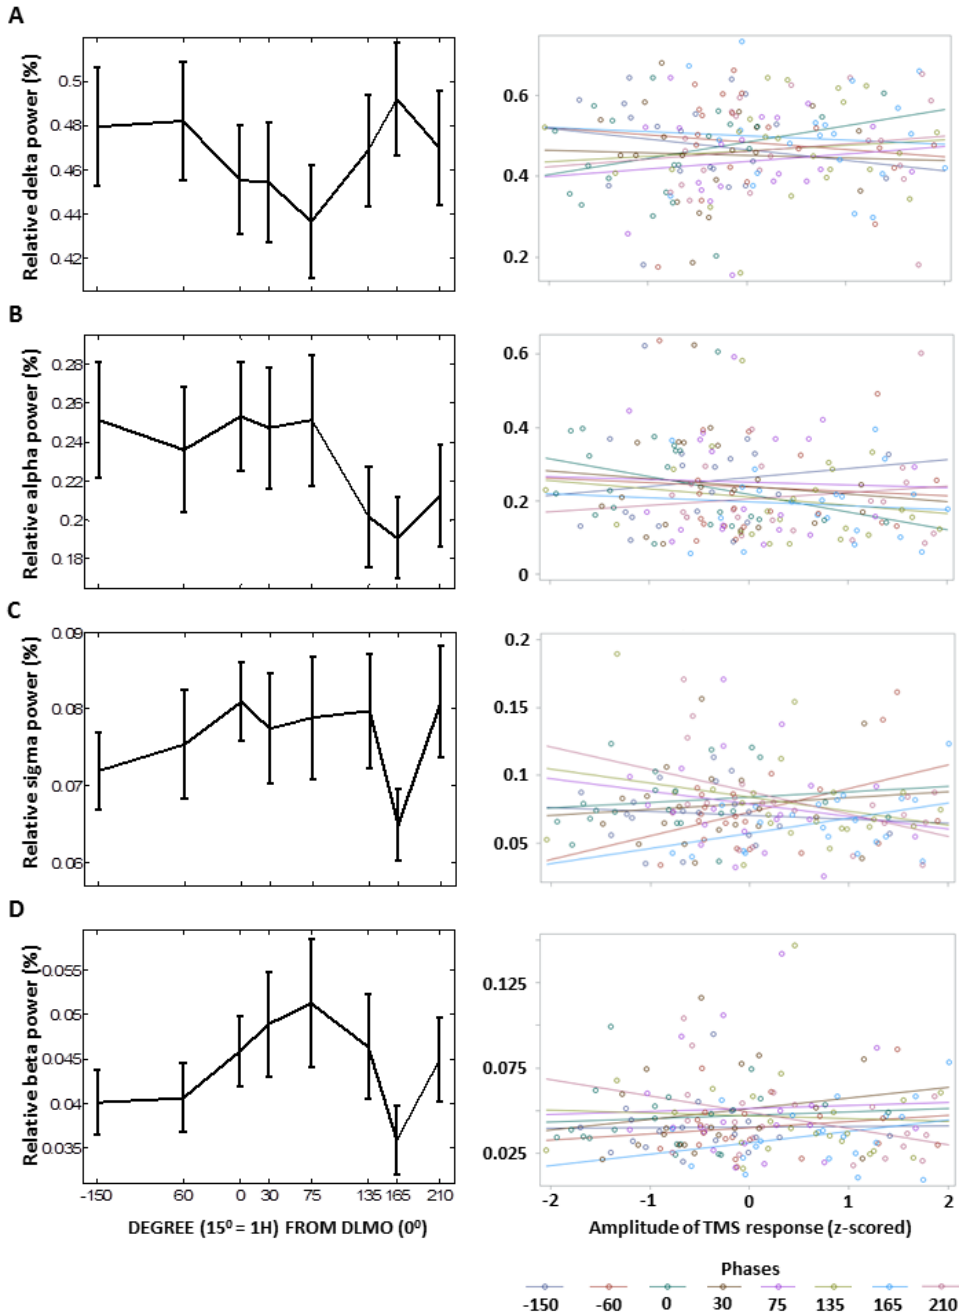

39

40 **Supplementary figure 4. Changes in frontal EEG power across 29h of sustained wakefulness.**

41 **A.** Relative delta power (0.75-4Hz) did not change significantly across the protocol (PROC

42 MIXED; N = 22; main effect of circadian phase :  $F_{7,109} = 1.53$ ,  $p = 0.17$ ) and ANCOVAs (right panel)

43 did not reveal significant association with cortical excitability measures [AMPLITUDE (displayed):  
44  $r^2 = 0.04$ ;  $p = 0.96$  – SLOPE:  $r^2 = 0.05$ ;  $p = 0.95$ ].

45 **B.** Relative alpha power (8-12Hz) changed significantly across the protocol (PROC MIXED; N = 22;  
46 main effect of circadian phase:  $F_{7,109} = 3.79$ ,  $p = 0.001$ ) but ANCOVAs (right panel) did not reveal  
47 significant association with cortical excitability measures [AMPLITUDE (displayed):  $r^2 = 0.06$ ;  
48  $p = 0.87$  – SLOPE:  $r^2 = 0.07$ ;  $p = 0.77$ ].

49 **C.** Relative sigma power (12.5-18Hz) did not change significantly across the protocol (PROC  
50 MIXED; N = 22; main effect of circadian phase:  $F_{7,111} = 1.73$ ,  $p = 0.11$ ) and ANCOVAs (right panels)  
51 did not reveal significant association with cortical excitability measures [AMPLITUDE (displayed):  
52  $r^2 = 0.13$ ;  $p = 0.13$  – SLOPE:  $r^2 = 0.11$ ;  $p = 0.27$ ].

53 **D.** Relative beta power (18.5-30Hz) did not change significantly across the protocol (PROC  
54 MIXED; N = 22; main effect of circadian phase:  $F_{7,112} = 1.84$ ,  $p = 0.09$ ) and ANCOVAs (right panels)  
55 did not reveal significant association with cortical excitability measures [AMPLITUDE (displayed):  
56  $r^2 = 0.08$ ;  $p = 0.66$  – SLOPE:  $r^2 = 0.08$ ;  $p = 0.67$ ].

57

58 **Supplementary Tables**

59 **Supplementary Table 1.** Sample demographics (Mean  $\pm$  Standard deviation), and sleep-wake timing  
 60 during 7 days preceding the laboratory experiment based on sleep diary and actigraphy data (Median  $\pm$   
 61 Standard deviation).

|    |                                                |            |            |
|----|------------------------------------------------|------------|------------|
| 62 | <hr/>                                          |            |            |
| 63 | <hr/>                                          |            |            |
| 64 | <b>N</b>                                       | 22         |            |
|    | <b>AGE</b>                                     | 22.82      | $\pm$ 2.61 |
| 65 | <b>ETHNICITY</b>                               | Caucasians |            |
|    | <b>BODY MASS INDEX</b>                         | 22.23      | $\pm$ 2.05 |
| 66 | <b>ANXIETY LEVEL (BDII)</b>                    | 1.23       | $\pm$ 1.93 |
|    | <b>MOOD (BECK)</b>                             | 1.68       | $\pm$ 2.12 |
| 67 | <b>DAYTIME PROPENSITY TO FALL ASLEEP (ESS)</b> | 3.73       | $\pm$ 2.73 |
|    | <b>CHRONOTYPE (HO)</b>                         | 52.41      | $\pm$ 5.03 |
| 68 | <b>RIGHT HANDED</b>                            | 17/22      |            |
| 69 | <b>SLEEP QUALITY (PSQI)</b>                    | 4.09       | $\pm$ 0.15 |
|    | <b>SEASONALITY (SPAQ)</b>                      | 0.64       | $\pm$ 0.79 |
| 70 | <b>CAFFEINE (cup/day)</b>                      | 0.41       | $\pm$ 0.50 |
|    | <b>ALCOHOL (unit/week)</b>                     | 3.41       | $\pm$ 0.20 |
| 71 | <b>CHRONOTYPE (MCTQ)</b>                       | 4.76       | $\pm$ 0.16 |
|    | <b>SLEEP TIME (Sleep diary)</b>                | 23:25      | $\pm$ 0:20 |
| 72 | <b>WAKE TIME (Sleep diary)</b>                 | 7:30       | $\pm$ 0:17 |
|    | <b>SLEEP DURATION (Sleep diary)</b>            | 8:10       | $\pm$ 0:15 |
| 73 | <b>SLEEP TIME (Actigraphy)</b>                 | 23:30      | $\pm$ 0:15 |
| 74 | <b>WAKE TIME (Actigraphy)</b>                  | 7:30       | $\pm$ 0:20 |
| 75 | <b>SLEEP DURATION (Actigraphy)</b>             | 8:00       | $\pm$ 0:20 |
| 76 | <hr/>                                          |            |            |

77 ANXIETY LEVEL was measured on the 21 item Beck Anxiety Inventory (BAI $\leq$ 14) <sup>1</sup>; CHRONOTYPE was  
 78 assessed by the Horne-Ösberg Questionnaire <sup>2</sup>; Daytime propensity to fall asleep in non-stimulating  
 79 situations was assessed by the Epworth Sleepiness Scale (ESS $\leq$ 11) <sup>3</sup>; MOOD was assessed using the 21-  
 80 item Beck Depression Inventory II (BDI-II $\leq$ 14) <sup>4</sup>; SLEEP QUALITY was determined by the Pittsburgh Sleep  
 81 Quality Index Questionnaire (PSQI $\leq$ 7) <sup>5</sup>. SEASONALITY is based on the Seasonal Pattern Assessment  
 82 Questionnaire (SPAQ $\leq$ 11) <sup>6</sup>. The Edinburgh Inventory <sup>7</sup> was administered to verify that the participants  
 83 were right-handed. Sleep parameters are presented in hours.

84 **Supplementary Table 2. Characteristics of the 8h baseline sleep immediately preceding the sleep**85 **deprivation protocol** (n = 22 ; mean  $\pm$  Standard Error of the Mean).

86

87

88

89

**Baseline night Sleep Structure**

|                             |      |       |      |
|-----------------------------|------|-------|------|
| <b>Total Sleep Time (h)</b> | 7.4  | $\pm$ | 0.15 |
| <b>Sleep Efficiency (%)</b> | 92.5 | $\pm$ | 1.9  |
| <b>Wake (min)</b>           | 27   | $\pm$ | 4.3  |
| <b>NREM stage 1 (min)</b>   | 63   | $\pm$ | 4.5  |
| <b>NREM stage 2 (min)</b>   | 220  | $\pm$ | 7.9  |
| <b>NREM stage 3 (min)</b>   | 78   | $\pm$ | 6.2  |
| <b>REM (min)</b>            | 85   | $\pm$ | 4.1  |

90 **SUPPLEMENTARY REFERENCES**

- 91 1. Beck, A. T., Epstein, N., Brown, G. & Steer, R. A. An inventory for measuring clinical  
92 anxiety: psychometric properties. *J Consult Clin Psychol* **56**, 893–897 (1988).
- 93 2. Horne, J. A. & Ostberg, O. A self-assessment questionnaire to determine morningness-  
94 eveningness in human circadian rhythms. *Int J Chronobiol* **4**, 97–110 (1976).
- 95 3. Johns, M. W. A new method for measuring daytime sleepiness: the Epworth sleepiness  
96 scale. *Sleep* **14**, 540–545 (1991).
- 97 4. Steer, R. A., Ball, R., Ranieri, W. F. & Beck, A. T. Further evidence for the construct validity  
98 of the Beck depression Inventory-II with psychiatric outpatients. *Psychol Rep* **80**, 443–446  
99 (1997).
- 100 5. Buysse, D. J., Reynolds 3rd, C. F., Monk, T. H., Berman, S. R. & Kupfer, D. J. The Pittsburgh  
101 Sleep Quality Index: a new instrument for psychiatric practice and research. *Psychiatry*  
102 *Res* **28**, 193–213 (1989).
- 103 6. Rosenthal N, Bradt G, W. T. Seasonal Pattern Assessment Questionnaire (SPAQ). *Natl. Inst.*  
104 *Ment. Heal. Bethesda, MD* (1984).
- 105 7. Oldfield, R. C. The assessment and analysis of handedness: the Edinburgh inventory.  
106 *Neuropsychologia* **9**, 97–113 (1971).

107

108
